# Supplementary material
Source: PubMed Central journal article supplement (PMC2632979)
Supplement: NIHMS85529-supplement-2.pdf [file NIHMS85529-supplement-2.pdf]

# Quantum Dot Nanobarcode: Epitaxial Assembly of Nanoparticle-Polymer Complexes in Homogeneous Solution

Jian Yang, Shivang R. Dave, and Xiaohu Gao\*

Contribution from the Department of Bioengineering, University of Washington, William H. Foegle Building N530M, Campus Box 355061, Seattle, WA 98195, USA. e-mail: [xgao@u.washington.edu](mailto:xgao@u.washington.edu)

## Supplementary Figures

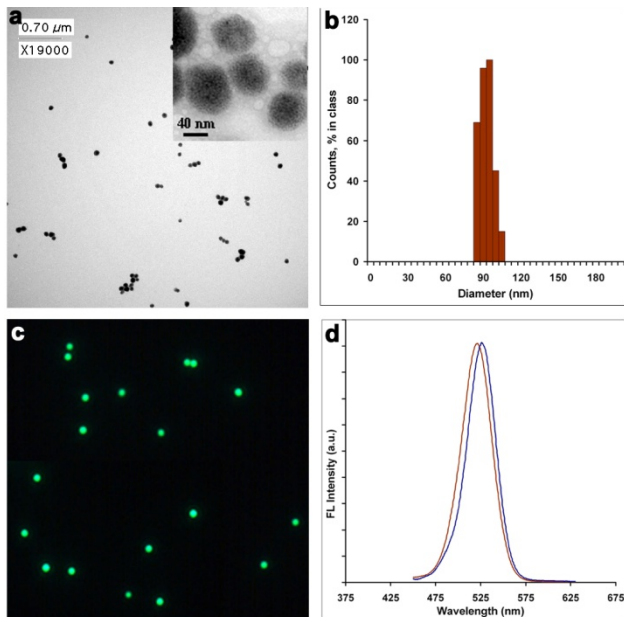

**Figure S1.** Characterization of structural and optical properties of green QD-nanobeads. The results are very similar to those of the red QD-nanobeads shown in Figure 3, except that a slight spectral shift toward longer wavelength was observed.

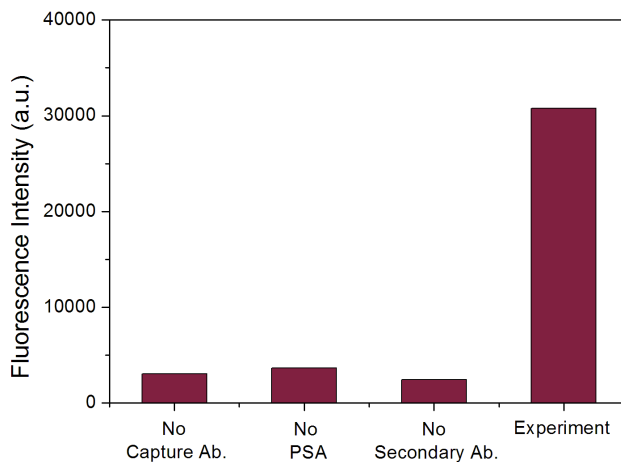

**Figure S2.** Negative control experiments of the ELISA assay for PSA detection. When the capture antibody (first column), the PSA target molecule (second column), or the secondary antibody (third column) were missing in the assay, the fluorescence intensity was in the background level indicating specific detection of PSA using QD-nanobeads.
